# Supplementary material for: In pursuit of a cure: The plural therapeutic landscape of onchocerciasis-associated epilepsy in Cameroon – A mixed methods study
Source: PLOS journal article supplement (doi:10.1371/journal.pntd.0009206), 2021-02-23
Supplement: S2 (10.1371/journal.pntd.0009206.s002) [file journal.pntd.0009206.s002]

**S1 Table. Confidence intervals for weighted proportions, means and medians presented in the text\*.**

For proportions, N=1313

| Variables                                                                                                                                                             | Estimate*   | 90% confidence interval* |
|-----------------------------------------------------------------------------------------------------------------------------------------------------------------------|-------------|--------------------------|
| <b>Socio-demographic characteristics of study participants</b>                                                                                                        |             |                          |
| Migrants' duration of residence in the village, median number of years                                                                                                | 8           | 7 - 9                    |
| <b>Activities</b>                                                                                                                                                     |             |                          |
| - Farming                                                                                                                                                             | 1032 (75.3) | 73.0 – 77.5              |
| - Cacao farming                                                                                                                                                       | 793 (64.9)  | 62.7 – 67.0              |
| - Fishing                                                                                                                                                             | 431 (27.0)  | 25.1 – 29.0              |
| - Hunting                                                                                                                                                             | 178 (13.0)  | 11.6 – 14.5              |
| <b>Education</b>                                                                                                                                                      |             |                          |
| Primary school                                                                                                                                                        | 629 (44.7)  | 42.4 – 47.0              |
| First cycle secondary                                                                                                                                                 | 459 (37.1)  | 34.8 – 39.4              |
| <b>Median age survey participants</b>                                                                                                                                 | 35          | 35 – 37                  |
| <b>Perceived signs of epilepsy</b>                                                                                                                                    |             |                          |
| Median number of signs                                                                                                                                                | 4           | 4 – 4                    |
| Unexpected falling or collapsing                                                                                                                                      | 1092 (82.3) | 80.3 – 84.1              |
| Shaking                                                                                                                                                               | 917 (66.5)  | 64.2 – 68.7              |
| <b>Perceived prevalence of epilepsy</b>                                                                                                                               |             |                          |
| Know someone with epilepsy                                                                                                                                            | 1212 (94.3) | 92.5 – 95.6              |
| Total self-reported epilepsy                                                                                                                                          | 64 (3.6)    | 3.0 – 4.5                |
| Reported confirmation of epilepsy by a healthcare worker, among self-reported epilepsy                                                                                | 46 (71.1)   | 60.8 – 79.7              |
| Mean age difference in years between (i) participants who self-reported having epilepsy and (ii) those who did not (i.e. the self-reported epilepsy group is younger) | 6.9         | 5.0 – 8.9                |
| Total male self-reported epilepsy                                                                                                                                     | 31 (3.3)    | 2.5 – 4.4                |
| Total female self-reported epilepsy                                                                                                                                   | 33 (4.0)    | 3.0 – 5.3                |
| Mean age difference for perceiving an aggravated epilepsy situation                                                                                                   | 11.1        | 9.4 – 12.7               |
| <b>Perceived aetiology of epilepsy</b>                                                                                                                                |             |                          |
| Don't know the cause of epilepsy                                                                                                                                      | 570 (40.9)  | 38.6 – 43.3              |
| Don't know but gave cause(s) anyway                                                                                                                                   | 39 (5.6)    | 4.2 – 7.3                |
| Epilepsy is not contagious                                                                                                                                            | 997 (75.8)  | 73.7 – 77.8              |
| <b>Comparison two questions about the cause of epilepsy:</b>                                                                                                          |             |                          |
| (A) What is the cause of epilepsy? Answer: sorcery                                                                                                                    | 574 (46.0)  | 43.6 – 48.4              |
| (B) Can epilepsy be caused by sorcery? Answer: Yes                                                                                                                    | 874 (84.0)  | 81.9 – 85.8              |
| <b>Therapeutic landscape</b>                                                                                                                                          |             |                          |
| Median number of answers in case (i)                                                                                                                                  | 2           | 1 – 2                    |

|                                             |             |             |
|---------------------------------------------|-------------|-------------|
| Median number of answers in case (ii)       | 2           | 2 – 2       |
| Median number of answers in case (iii)      | 1           | 1 – 1       |
| Biomedical channels mentioned in case (i)   | 49 (74.5)   | 64.0 – 82.8 |
| Biomedical channels mentioned in case (ii)  | 1075 (81.0) | 79.0 – 82.9 |
| Biomedical channels mentioned in case (iii) | 659 (46.9)  | 44.5 – 49.3 |

### **Knowledge about the aetiology of onchocerciasis and ivermectin**

#### **Blackflies**

|                                                        |             |             |
|--------------------------------------------------------|-------------|-------------|
| Blackflies can cause a disease                         | 1163 (88.5) | 86.8 – 90.0 |
| Blackflies can cause onchocerciasis/filariasis/filaria | 493 (40.0)  | 37.6 – 42.5 |
| Blackflies can cause malaria                           | 364 (34.6)  | 32.3 – 37.0 |
| Blackflies can cause skin rashes/itches                | 381 (31.4)  | 29.2 – 33.8 |
| Blackflies can cause skin diseases                     | 190 (15.3)  | 13.6 – 17.1 |
| Blackflies can cause eye problems                      | 142 (11.0)  | 9.6 – 12.6  |
| Blackflies can cause scabies                           | 109 (8.9)   | 7.5 – 10.5  |
| Blackflies can cause epilepsy                          | 17 (1.6)    | 1.0 – 2.4   |

#### **Preventive measures against blackfly biting**

|                                     |             |             |
|-------------------------------------|-------------|-------------|
| - Covering the body (with clothing) | 1138 (86.1) | 84.3 – 87.7 |
| - Applying lime juice to the skin   | 146 (11.0)  | 9.6 – 12.6  |
| - Applying petrol to the skin       | 129 (8.9)   | 7.7 – 10.2  |

#### **Knowledge about Mectizan**

|                                |             |             |
|--------------------------------|-------------|-------------|
| Heard of Mectizan              | 1294 (98.5) | 97.6 – 99.1 |
| Aware of Mectizan distribution | 1235 (98.8) | 97.8 – 99.4 |

#### **Perceived purposes of Mectizan**

|                        |             |             |
|------------------------|-------------|-------------|
| - Filaria              | 1135 (86.8) | 84.5 – 88.7 |
| - Skin rashes          | 951 (71.8)  | 69.0 – 74.4 |
| - Blackflies           | 718 (51.7)  | 48.8 – 54.6 |
| - Eye (sight) problems | 857 (64.3)  | 61.4 – 67.1 |
| - Bumps/nodules        | 661 (47.8)  | 44.9 – 50.8 |
| - Worms                | 559 (42.3)  | 39.5 – 45.3 |
| - Onchocerciasis       | 535 (39.8)  | 36.8 – 42.8 |
| - Mosquitoes           | 532 (38.5)  | 35.7 – 41.4 |

### **Community-directed treatment with ivermectin**

#### **How was the drug distributed to you last time?**

|                                        |            |             |
|----------------------------------------|------------|-------------|
| - To my house                          | 710 (62.6) | 60.5 – 64.6 |
| - Went to community distributor's home | 237 (12.9) | 11.7 – 14.1 |

#### **Reported uninterrupted long-term uptake**

|                                                                                          |            |             |
|------------------------------------------------------------------------------------------|------------|-------------|
| - Spent more than one year without taking Mectizan since first uptake (= not continuous) | 745 (61.6) | 58.4 – 64.6 |
| - Reported interrupted uptake – low prevalence villages                                  | 274 (56.5) | 49.6 – 63.0 |
| - Reported interrupted uptake – high prevalence villages                                 | 471 (67.4) | 63.1 – 71.4 |

#### **Reasons for non-continuous yearly Mectizan uptake**

|                                     |            |             |
|-------------------------------------|------------|-------------|
| - Away from the village at the time | 171 (24.9) | 22.1 – 27.9 |
|-------------------------------------|------------|-------------|

|                                      |            |             |
|--------------------------------------|------------|-------------|
| - Distributors not visiting my house | 153 (20.0) | 17.5 – 22.8 |
| - Pregnant/breastfeeding             | 141 (18.6) | 16.2 – 21.3 |
| - Afraid of side-effects             | 137 (18.4) | 16.2 – 20.8 |

**Is it worthwhile to take Mectizan despite possible reactions?**

|                |            |             |
|----------------|------------|-------------|
| - Yes          | 984 (76.0) | 73.3 – 78.5 |
| - No/sometimes | 200 (15.6) | 13.4 – 18.0 |
| - Don't know   | 108 (8.4)  | 6.9 – 11.4  |

**Impression of Mectizan**

|                                                             |             |             |
|-------------------------------------------------------------|-------------|-------------|
| - Mectizan is useful                                        | 1136 (87.7) | 85.5 – 89.6 |
| - Mectizan has improved the health situation in the village | 845 (68.6)  | 65.7 – 71.5 |

---

*\*Note:* Proportions are presented with unweighted frequencies as n (%), with confidence intervals likewise expressed as percentages. Differences between means are presented with the unweighted means in parentheses. Confidence intervals generalize to a finite population consisting of the nine sampled villages, while taking into account clustering in villages and households. Weights and finite population correction are applied using the estimated total number of households per village.
